# Supplementary material for: The Outcome of Phagocytic Cell Division with Infectious Cargo Depends on Single Phagosome Formation
Source: PLoS One. 2008 Sep 16;3(9):e3219. doi: 10.1371/journal.pone.0003219 (PMC2535564; doi:10.1371/journal.pone.0003219)
Supplement: Data Set S4 — was the calculated results of DIT. (0.02 MB XLS) [file pone.0003219.s008.xls]

## Sheet: Sheet1
Particle number	Distribution index
1	1
2	0.5
3	0.5
4	0.375
5	0.375
6	0.3125
7	0.3125
8	0.273438
9	0.273438
10	0.246094
11	0.246094
12	0.225586
13	0.225586
14	0.209473
15	0.209473
16	0.196381
17	0.196381
18	0.185471
19	0.185471
20	0.176197
21	0.176197
22	0.168188
23	0.168188
24	0.16118
25	0.16118
26	0.154981
27	0.154981
28	0.149446
29	0.149446
30	0.144464
31	0.144464
32	0.13995
33	0.13995
34	0.135834
35	0.135834
36	0.132061
37	0.132061
38	0.128585
39	0.128585
40	0.125371
41	0.125371
42	0.122386
43	0.122386
44	0.119604
45	0.119604
46	0.117004
47	0.117004
48	0.114567
49	0.114567
50	0.112275
51	0.112275
52	0.110116
53	0.110116
54	0.108077
55	0.108077
56	0.106147
57	0.106147
58	0.104317
59	0.104317
60	0.102578
61	0.102578
62	0.100924
63	0.100924
64	0.0993468
65	0.0993468
66	0.0978415
67	0.0978415
68	0.0964027
69	0.0964027
70	0.0950255
71	0.0950255
72	0.0937057
73	0.0937057
74	0.0924394
75	0.0924394
76	0.0912231
77	0.0912231
78	0.0900535
79	0.0900535
80	0.0889279
81	0.0889279
82	0.0878434
83	0.0878434
84	0.0867976
85	0.0867976
86	0.0857884
87	0.0857884
88	0.0848135
89	0.0848135
90	0.0838711
91	0.0838711
92	0.0829595
93	0.0829595
94	0.0820769
95	0.0820769
96	0.081222
97	0.081222
98	0.0803932
99	0.0803932
100	0.0795892
